# Supplementary material for: Red Cell Distribution Width and Mortality in Patients Undergoing Percutaneous Coronary Intervention
Source: MDPI journal article supplement (doi:10.3390/biomedicines10010045), 2021-12-26
Supplement: s1 [file s1]

**Supplementary Table S1.** Multivariable Cox-Proportional Hazards Regression Analysis for Mortality Outcome of Study Patients

|                            | Unadjusted HR | 95% CI       | <i>p</i> for trend | Adjusted HR | 95% CI      | <i>p</i> for trend |
|----------------------------|---------------|--------------|--------------------|-------------|-------------|--------------------|
| 1-year all-cause mortality |               |              |                    |             |             |                    |
| Group 1 RDW ≤ 13.3         | 1.000         | -            | .019               | 1.000       | -           | .006               |
| Group 2 RDW 13.4-14.0      | 2.166         | 1.682-2.790  |                    | 1.394       | 1.078-1.804 |                    |
| Group 3 RDW 14.1-14.7      | 3.681         | 2.823-4.800  |                    | 1.592       | 1.208-2.099 |                    |
| Group 4 RDW 14.8-15.8      | 5.973         | 4.613-7.735  |                    | 2.003       | 1.518-2.643 |                    |
| Group 5 RDW ≥15.9          | 11.100        | 8.843-13.934 |                    | 2.689       | 2.076-3.485 |                    |
| 1-year CV mortality        |               |              |                    |             |             |                    |
| Group 1 RDW ≤ 13.3         | 1.000         | -            | .006               | 1.000       | -           | .015               |
| Group 2 RDW 13.4-14.0      | 2.375         | 1.636-3.446  |                    | 1.533       | 1.049-2.240 |                    |
| Group 3 RDW 14.1-14.7      | 3.601         | 2.407-5.387  |                    | 1.568       | 1.029-2.387 |                    |
| Group 4 RDW 14.8-15.8      | 4.792         | 3.162-7.264  |                    | 1.609       | 1.031-2.509 |                    |
| Group 5 RDW ≥15.9          | 10.378        | 7.328-14.698 |                    | 2.710       | 1.825-4.026 |                    |

Abbreviations: CI, confidence interval; CV, cardiovascular; HR, hazard ratio; RDW, red cell distribution width.

**Supplementary Table S2.** Multivariable Logistic Regression Analysis for Mortality Outcome according to the optimal cut-point value of RDW.

|                             | Unadjusted OR | 95% CI      | Adjusted OR | 95% CI      |
|-----------------------------|---------------|-------------|-------------|-------------|
| 6-month all-cause mortality |               |             |             |             |
| RDW <13.3                   | 1.000         | -           | 1.000       | -           |
| RDW ≥13.3                   | 4.931         | 3.731-6.516 | 2.021       | 1.496-2.731 |
| 6-month CV mortality        |               |             |             |             |
| RDW <13.8                   | 1.000         | -           | 1.000       | -           |
| RDW ≥13.8                   | 4.638         | 3.292-6.533 | 1.919       | 1.314-2.802 |
| 1-year all-cause mortality  |               |             |             |             |
| RDW <13.8                   | 1.000         | -           | 1.000       | -           |
| RDW ≥13.8                   | 5.125         | 4.297-6.112 | 1.952       | 1.599-2.384 |
| 1-year CV mortality         |               |             |             |             |
| RDW <13.8                   | 1.000         | -           | 1.000       | -           |
| RDW ≥13.8                   | 4.301         | 3.313-5.584 | 1.732       | 1.293-2.319 |

Abbreviations: CI, confidence interval; CV, cardiovascular; OR, Odds ratio; RDW, red cell distribution width.
